# Supplementary material for: Hierarchically mesoporous carbon nanopetal based electrodes for flexible supercapacitors with super-long cyclic stability
Source: Royal Society of Chemistry journal article supplement (doi:10.1039/c5ta05603a), 2015-01-01
Supplement: c5ta05603a1.pdf [file c5ta05603a1.pdf]

## **Hierarchically mesoporous carbon nanopetal based electrodes for flexible supercapacitors with super-long cyclic stability**

**Jayesh Cherusseri<sup>a</sup> and Kamal K. Kar<sup>a,b\*</sup>**

<sup>a</sup>Advanced Nanoengineering Materials Laboratory, Materials Science Programme, Indian Institute of Technology, Kanpur, Uttar Pradesh-208016, India.

<sup>b</sup>Advanced Nanoengineering Materials Laboratory Department of Mechanical Engineering, Indian Institute of Technology, Kanpur, Uttar Pradesh-208016, India.

\*Corresponding Author. Tel: +91-512-2597687, E-mail: kamalkk@iitk.ac.in (Kamal K. Kar)

### **Electronic Supplementary Information**

#### **List of Contents**

#### **Supplementary Tables:**

**Table S1.** Comparison of gravimetric capacitances achieved by the various carbon nanomaterials based supercapacitors.

#### **Supplementary Methods:**

**Method S1.** Calculation of ionic conductivity of CNPs/UCF supercapacitor electrodes.

**Method S2.** Calculation of discharge capacitance of CNPs/UCF supercapacitor.

**Method S3.** Calculation of areal capacitance of CNPs/UCF supercapacitor.

**Method S4.** Calculation of volumetric capacitance of CNPs/UCF supercapacitor.

**Method S5.** Calculation of volume specific capacitance of CNPs/UCF supercapacitor

**Method S6.** Calculation of volume specific energy density of CNPs/UCF supercapacitor.

**Method S7.** Calculation of volume specific power density of CNPs/UCF supercapacitor.

**Method S8.** Calculation of gravimetric capacitance of CNPs/UCF supercapacitor.

**Method S9:** Calculation of gravimetric energy density of CNPs/UCF supercapacitor.

### **Supplementary Figures:**

**Fig. S1.** Assembly of CNPs/UCF supercapacitor cell by using CNPs/UCF electrode-cum-current collectors.

**Fig. S2.** SEM image of nickel-coated UCFs.

**Fig. S3.** EDS spectra of oxidized, nickel-coated UCFs.

**Fig. S4.** Plot of variations in the volumetric capacitance of CNPs/UCF supercapacitor cell at different current densities.

**Fig. S5.** Digital image of the two electrode cell set-up used for the testing of CNPs/UCF supercapacitor at various bending angles.

**Fig. S6.** Plot of percentage retention in the areal capacitance of CNPs/UCF supercapacitor cell at different bending angles.

**Fig. S7.** Plot of percentage retention in the gravimetric capacitance of CNPs/UCF supercapacitor cell at different bending angles.

**Fig. S8.** Plot of variation in the volumetric capacitance of CNPs/UCF supercapacitor cell at different bending angles.

**Fig. S9.** Plots of percentage retentions in the volumetric and volume specific capacitances of CNPs/UCF supercapacitor cell at different bending angles.

**Fig. S10.** Plot of variation in the gravimetric energy density of CNPs/UCF supercapacitor cell at different bending angles.

**Fig. S11.** Plots of percentage retentions in the volume specific and gravimetric energy densities of CNPs/UCF supercapacitor cell at different bending angles.

**Fig. S12.** Plots of percentage retentions in the volume specific and gravimetric power densities of CNPs/UCF supercapacitor cell at different bending angles.

**Table S1. Comparison of gravimetric capacitances achieved by the various carbon nanomaterials based supercapacitors.**

| Ref.  | Electrode Material/s           | Electrolyte                              | $C_{sc,sp,m}$ (F/g) |
|-------|--------------------------------|------------------------------------------|---------------------|
| [S2]  | SWNTs                          | 1 M NaCl (aqueous)                       | 25-30               |
|       | MWNTs                          | 1 M NaCl (aqueous)                       | 6-10                |
| [S3]  | MWNTs                          | 1 M LiPF <sub>6</sub> (EC-DEC)           | 35                  |
| [S4]  | Normal CNTs                    | 1 M LiClO <sub>4</sub> (EC-DEC)          | 25                  |
|       | Activated CNTs                 | 1 M LiClO <sub>4</sub> (EC-DEC)          | 50                  |
| [S5]  | CO <sub>2</sub> -oxidized CNTs | --                                       | 47                  |
| [S6]  | MWNTs                          | 6 N KOH                                  | 21                  |
| [S7]  | MWNTs                          | 1 M H <sub>2</sub> SO <sub>4</sub>       | 25.4                |
| [S8]  | SWNTs                          | 6 M KOH                                  | 40                  |
| [S9]  | Pristine CNTs                  | Aprotic electrolyte                      | 12.9                |
|       | Pristine CNTs                  | Protic electrolyte                       | 10.9                |
|       | Cup-stacked CNTs               | Aprotic electrolyte                      | 55.7                |
|       | Cup-stacked CNTs               | Protic electrolyte                       | 28.4                |
| [S10] | Pristine DWNTs                 | 0.5 M H <sub>2</sub> SO <sub>4</sub>     | 22                  |
|       | Pristine DWNTs                 | 1 M Et <sub>4</sub> NBF <sub>4</sub> /PC | 34                  |
|       | DWNT-HNO <sub>3</sub>          | 0.5 M H <sub>2</sub> SO <sub>4</sub>     | 54                  |
|       | DWNT-HNO <sub>3</sub>          | 1 M Et <sub>4</sub> NBF <sub>4</sub> /PC | 38                  |
| [S11] | MWNTs grown on metals          | 6 M KOH                                  | 10.75-21.57         |
| [S12] | CNTs grown on Ni-foam          | 6 M KOH                                  | 25                  |
| [S13] | SWNT film                      | 1 M LiClO <sub>4</sub> (EC-DEC-DMC)      | 35                  |
| [S14] | MWNTs                          | 38 wt% H <sub>2</sub> SO <sub>4</sub>    | 113                 |
| [S15] | SWNTs                          | 7.5 N KOH                                | 180                 |

|                     |                                |                |                                                                           |
|---------------------|--------------------------------|----------------|---------------------------------------------------------------------------|
| <b>Present Work</b> | <b>CNPs synthesized on UCF</b> | <b>5 M KOH</b> | <b>220 (at 2.77mA/cm<sup>2</sup>)<br/>154 (at 16.66mA/cm<sup>2</sup>)</b> |
|---------------------|--------------------------------|----------------|---------------------------------------------------------------------------|

**Method S1. Calculation of ionic conductivity of CNPs/UCF electrodes.**

The ionic conductivity of the supercapacitor electrodes is calculated by using the equation

$$\sigma = \frac{T}{R_b \times A}$$

Where  $\sigma$  is the ionic conductivity in S/cm, T is the total thickness of the supercapacitor cell (in cm),  $R_b$  is the bulk electrolyte resistance (in  $\Omega$ ), and A is the geometrical area of electrodes (in cm<sup>2</sup>).

**Method S2: Calculation of discharge capacitance of CNPs/UCF supercapacitor.**

The discharge capacitance of the supercapacitor is calculated by using equation

$$C_{sc} = \frac{It_{dis}}{\Delta E}$$

Where,  $C_{sc}$  is the discharge capacitance of the supercapacitor, I is the charging current,  $t_{dis}$  is the discharging time, and  $\Delta E$  is the operating potential window.

**Method S3: Calculation of areal capacitance of CNPs/UCF supercapacitor.**

The areal capacitance of the supercapacitor is calculated by using the equation

$$C_{sc, A} = \frac{C_{sc}}{A_{sc}}$$

Where,  $C_{sc, A}$  is the areal capacitance of the supercapacitor and  $A_{sc}$  is the total geometric area of two supercapacitor electrodes (i.e., two times the area of single electrode).

**Method S4: Calculation of volumetric capacitance of CNPs/UCF supercapacitor.**

The volumetric capacitance of the supercapacitor is calculated by using the equation

$$C_{sc, V} = \frac{C_{sc}}{V_{sc}}$$

Where,  $C_{sc, v}$  is the volumetric capacitance of the supercapacitor and  $V_{sc}$  is the total volume of the supercapacitor (total volume of two supercapacitor electrodes + volume of the separator with electrolyte).

**Method S5: Calculation of volume specific capacitance of CNPs/UCF supercapacitor.**

The volume specific capacitance of the supercapacitor is calculated [S1] by using the equation

$$C_{sc, sp, v} = 4 \times \frac{C_{sc}}{V_{el}}$$

Where,  $C_{sc, sp, v}$  is the volume specific capacitance of the supercapacitor,  $C_{sc}$  is the discharge capacitance of the supercapacitor,  $V_{el}$  is the total volume of two supercapacitor electrodes (the volumes of separator with electrolyte is not considered).

**Method S6: Calculation of volume specific energy density of CNPs/UCF supercapacitor.**

The volume specific energy density of the supercapacitor is calculated by using the equation

$$E_{sc, sp, v} = \frac{C_{sc, sp, v} \times (\Delta E)^2}{2 \times 3600}$$

Where  $E_{sc, sp, v}$  is the volume specific energy density and all other variables as defined above.

**Method S7: Calculation of volume specific power density of CNPs/UCF supercapacitor.**

The volume specific power density of the supercapacitor is calculated by using the equation

$$P_{sc, sp, v} = \frac{E_{sc, sp, v} \times 3600}{t_{dis}}$$

Where  $P_{sc, sp, v}$  is the volume specific power density and all other variables are defined above.

**Method S8: Calculation of gravimetric capacitance of CNPs/UCF supercapacitor.**

The gravimetric capacitance of the supercapacitor is calculated by using the equation

$$C_{sc, sp, m} = \frac{I \times t_{dis}}{M \times (\Delta E)} = \frac{C_{sc}}{M}$$

Where, 'M' is the total mass of CNPs in the two electrodes of the supercapacitor (excluding the mass of UCFs, separator, and electrolyte), and other variables are discussed above.

### Method S9: Calculation of gravimetric energy density of CNPs/UCF supercapacitor.

The gravimetric energy density of the supercapacitor is calculated by using the equation

$$E_{sc, sp, m} = \frac{C_{sc, sp, m} \times (\Delta E)^2}{2 \times 3600}$$

Where  $E_{sc, sp, m}$  is the gravimetric energy density and all other variables are defined above.

### Supplementary Figures:

**Fig. S1.** Assembly of CNPs/UCF supercapacitor cell by using CNPs/UCF electrode-cum-current collectors.

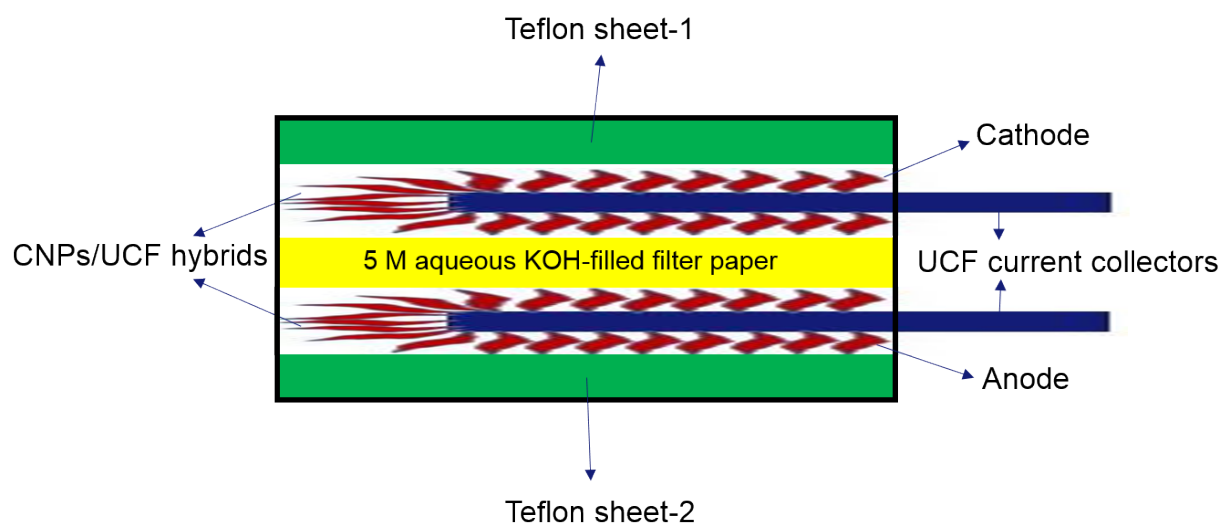

**Fig. S2.** SEM image of nickel-coated UCFs.

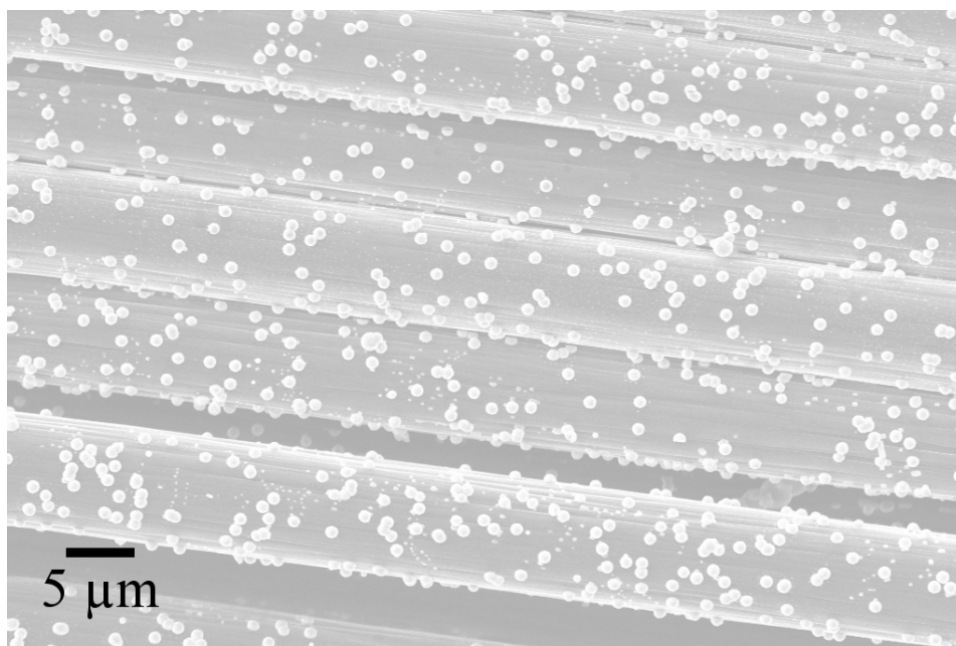

**Fig. S3.** EDS spectra of oxidized, nickel-coated UCFs.

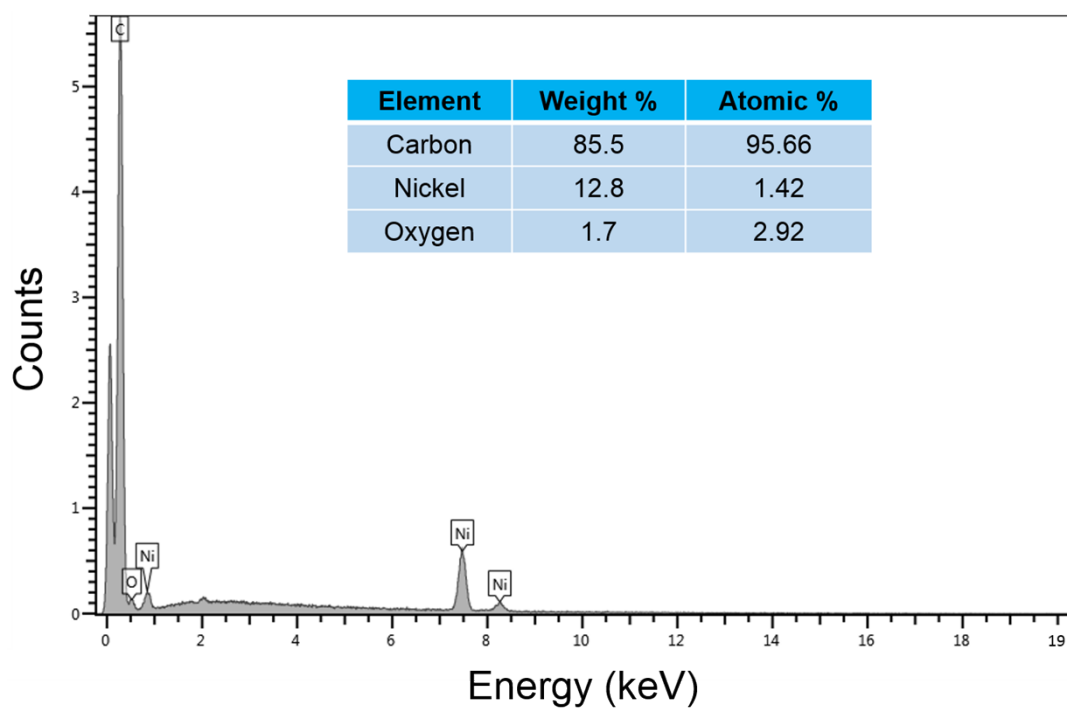

**Fig. S4.** Plot of variations in the volumetric capacitance of CNPs/UCF supercapacitor cell at different current densities.

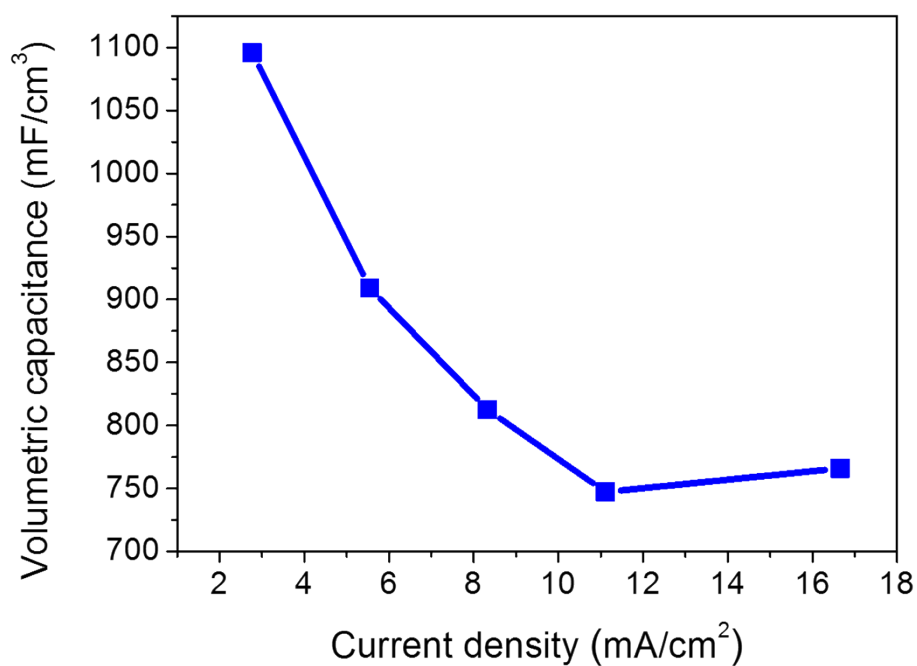

**Fig. S5.** Digital image of the two electrode cell set-up used for the testing of CNPs/UCF supercapacitor at various bending angles.

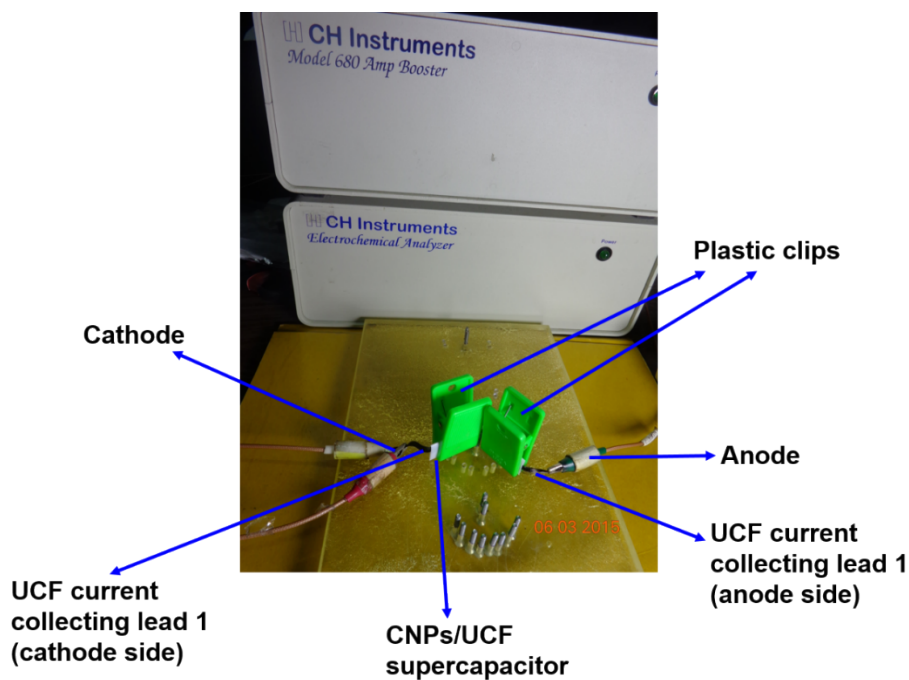



**Fig. S6.** Plot of percentage retention in the areal capacitance of CNPs/UCF supercapacitor cell at different bending angles.

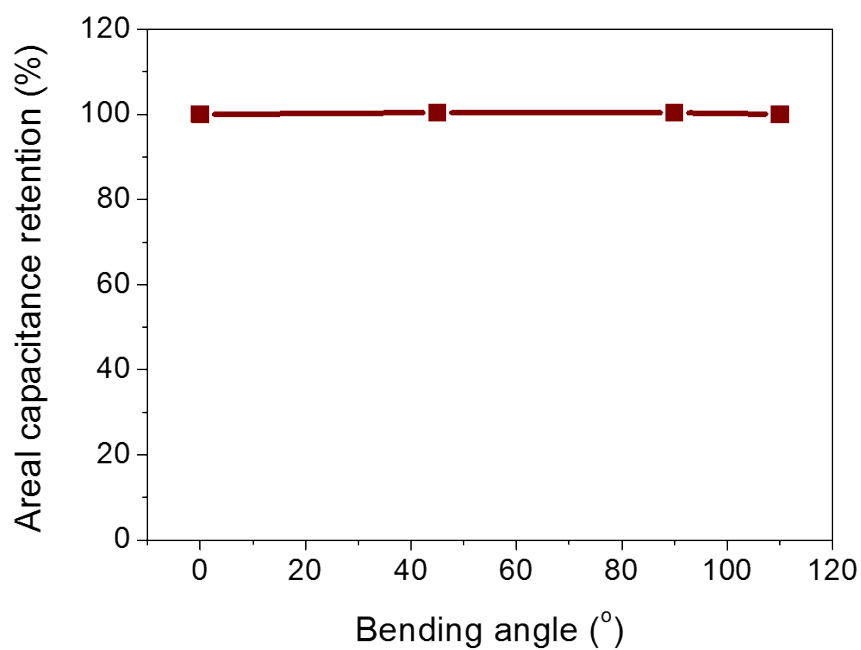

**Fig. S7.** Plot of percentage retention in the gravimetric capacitance of CNPs/UCF supercapacitor cell at different bending angles.

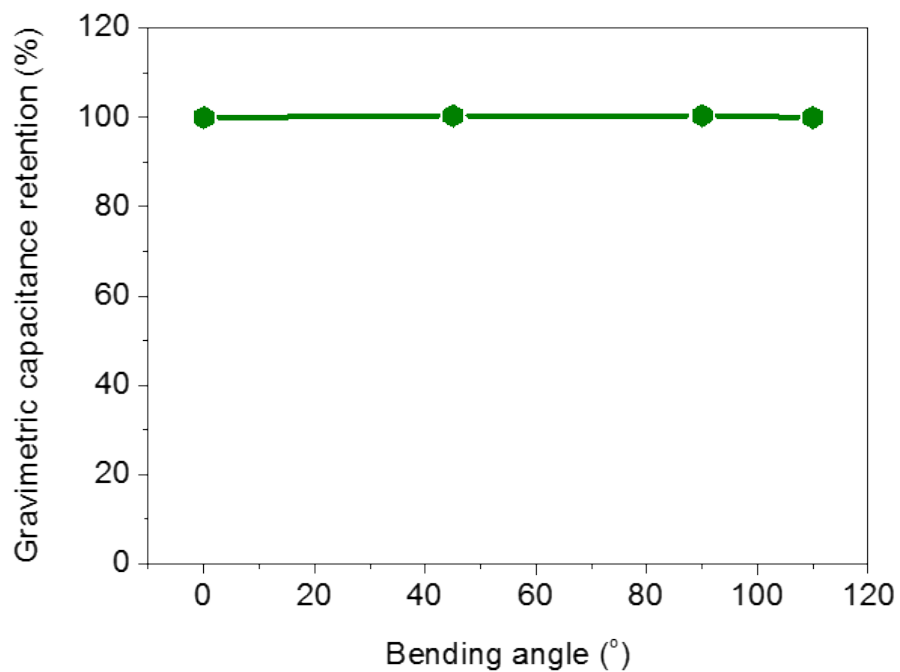

**Fig. S8.** Plot of variation in the volumetric capacitance of CNPs/UCF supercapacitor cell at different bending angles.

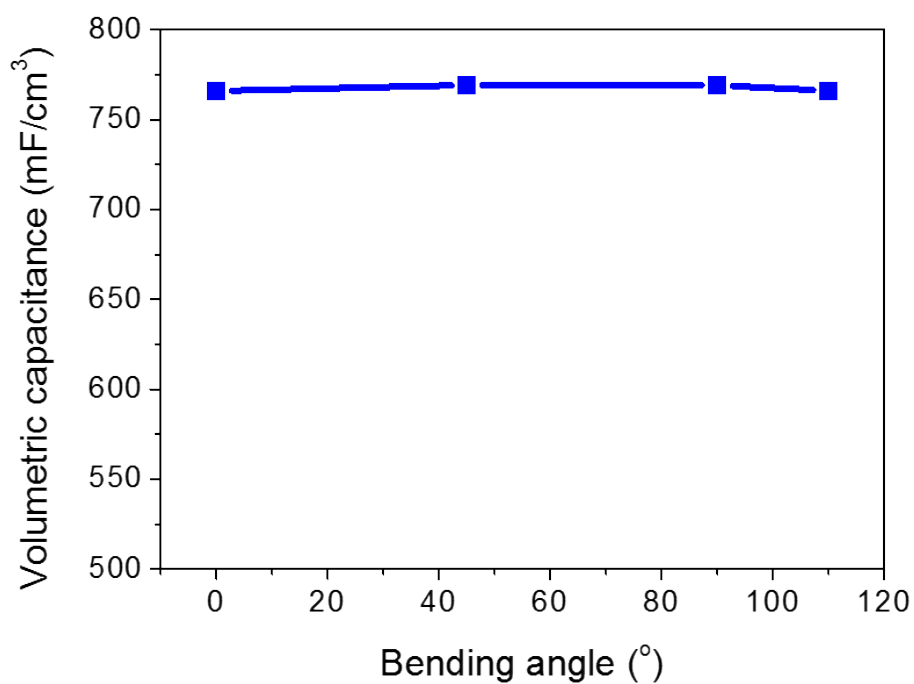

**Fig. S9.** Plots of percentage retentions in the volumetric and volume specific capacitances of CNPs/UCF supercapacitor cell at different bending angles.

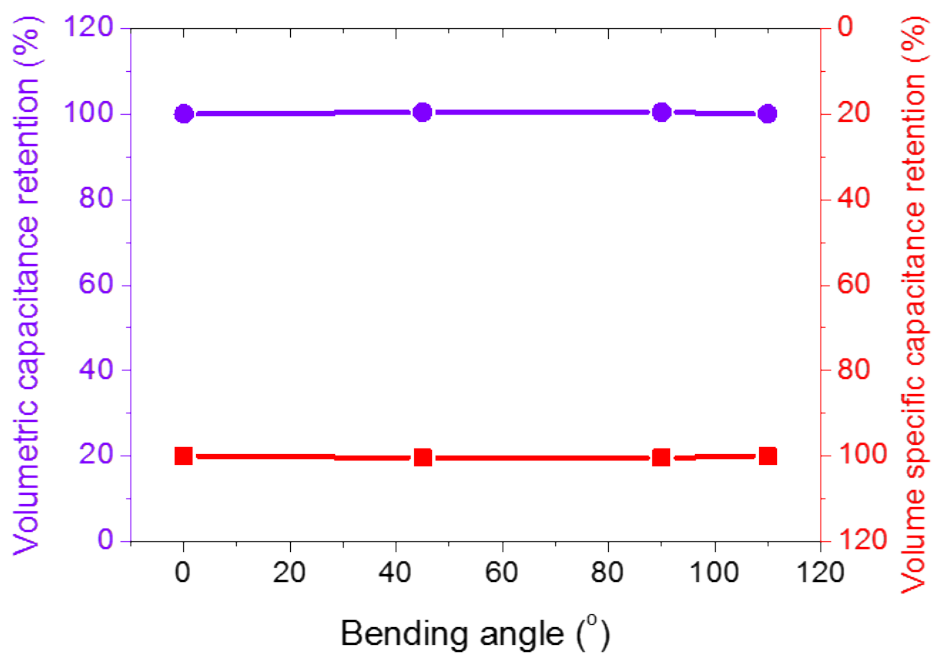

**Fig. S10.** Plot of variation in the gravimetric energy density of CNPs/UCF supercapacitor cell at different bending angles.

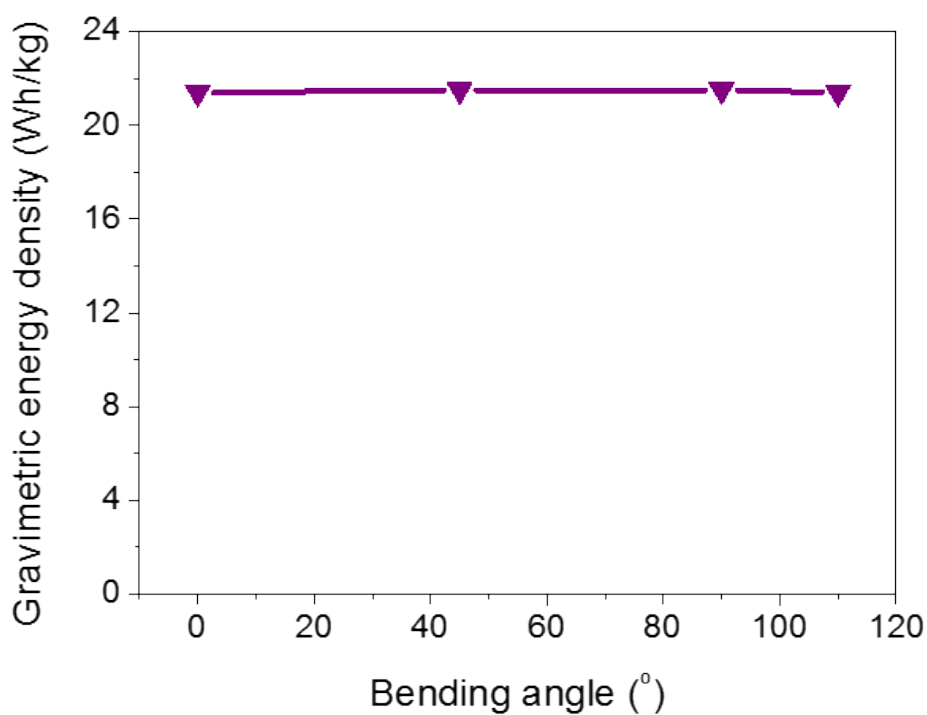

**Fig. S11.** Plots of percentage retentions in the volume specific and gravimetric energy densities of CNPs/UCF supercapacitor cell at different bending angles.

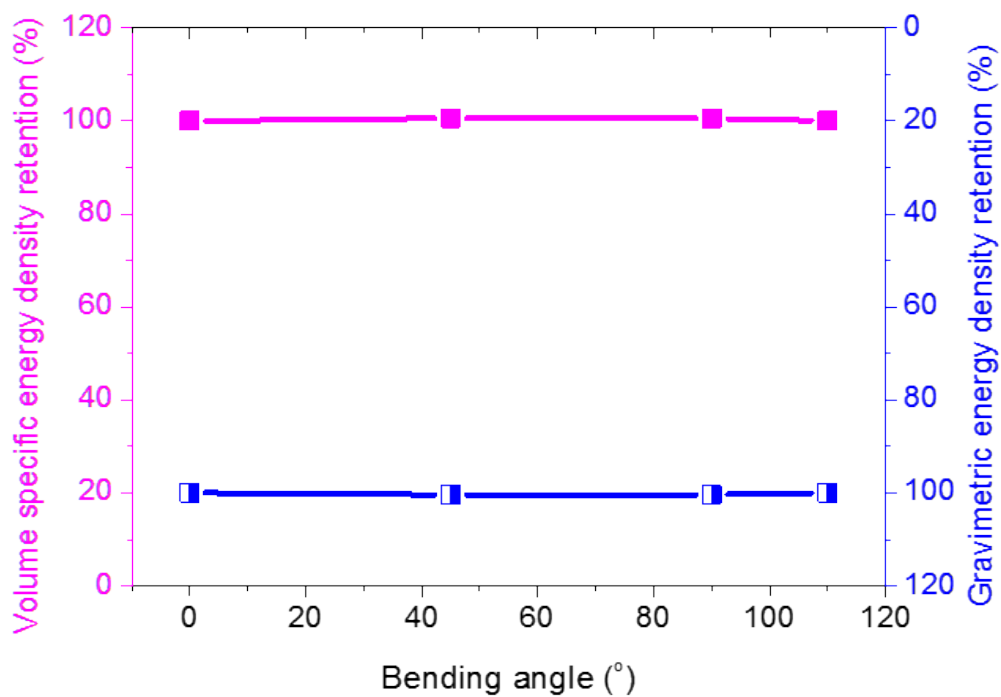

**Fig. S12.** Plots of percentage retentions in the volume specific and gravimetric power densities of CNPs/UCF supercapacitor cell at different bending angles.

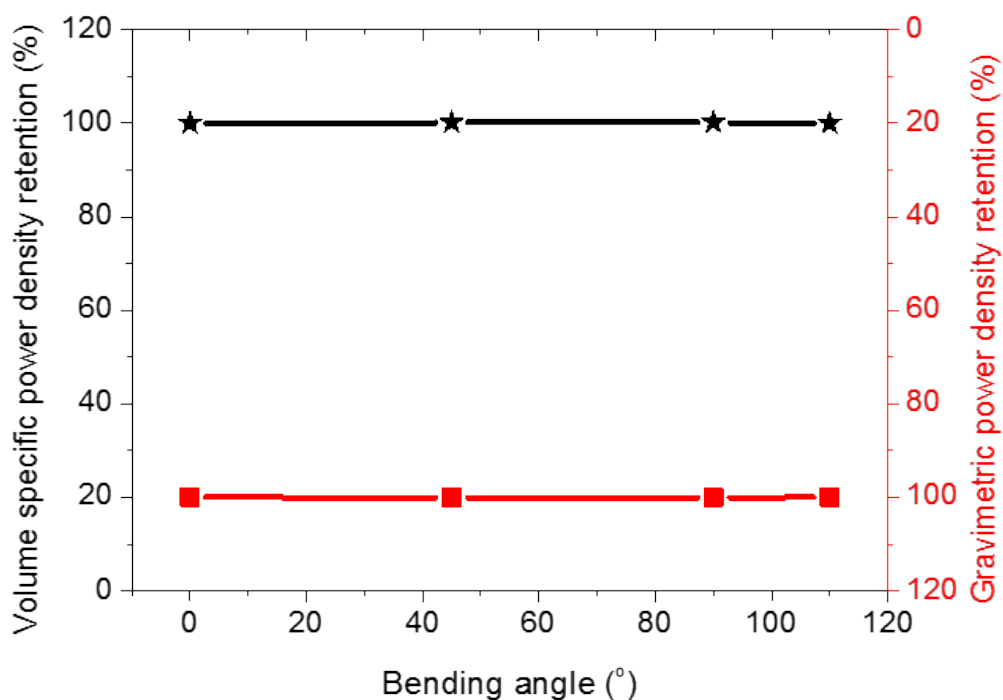

### References:

- [S1] D. Yu, K. Goh, H. Wang, L. Wei, W. Jiang, Q. Zhang, L. Dai, and Y. Chen, *Nature Nanotechnol.*, 2014, 9, 555.
- [S2] A. A. Zakhidov, D. S. Suh, A. A. Kuznetsov, J. N. Barisci, E. Munoz, A. B. Dalton, S. Collins, V. H. Ebron, M. Zhang, J. P. Ferraris, A. A. Zakhidov, and R. H. Baughman, *Adv. Funct. Mater.*, 2009, 19, 2266.
- [S3] E. Frackowiak, S. Gautier, H. Gaucher, S. Bonnamy, and F. Beguin, *Carbon*, 1999, 37, 61.
- [S4] Q. Jiang, M. Z. Qu, G. M. Zhou, B. L. Zhang, and Z. L. Yu, *Mater. Lett.*, 2002, 57, 988.
- [S5] C. S. Li, D. Z. Wang, T. X. Liang, G. T. Li, X. F. Wang, M. S. Cao, and J. Liang, *Sci. China, Ser. E-Technol. Sci.*, 2003, 46, 349.
- [S6] C. Du and N. Pan, *Nanotechnology*, 2006, 17, 5314.
- [S7] H. Mi, X. Zhang, S. An, X. Ye, and S. Yang, *Electrochem. Commun.*, 2007, 9, 2859.

- [S8] E. Frackowiak, K. Jurewicz, S. Delpeux, and F. Beguin, *J. Power Sources*, 2001, 97-98, 822.
- [S9] I. Y. Jang, H. Ogata, K. C. Park, S. H. Lee, J. S. Park, Y. C. Jung, Y. J. Kim, Y. A. Kim, and M. Endo, *J. Phys. Chem. Lett.*, 2010, 1, 2099.
- [S10] I. Y. Jang, H. Muramatsu, K. C. Park, Y. J. Kim, and M. Endo, *Electrochem. Commun.*, 2009, 11, 719.
- [S11] R. Shah, X. Zhang, and S. Talapatra, *Nanotechnology*, 2009, 20, 395202.
- [S12] R. Shi, L. Jiang, and C. Pan, *Soft Nanoscience Letters*, 2011, 1, 11.
- [S13] Z. Niu, W. Zhou, J. Chen, G. Feng, H. Li, W. Ma, J. Li, H. Dong, Y. Ren, D. Zhao, S. Xie, *Energy Environ. Sci.*, 2011, 4, 1440.
- [S14] C. Niu, E. K. Sichel, R. Hoch, D. Moy, H. Tennent, *Appl. Phys. Lett.*, 1997, 70, 1480.
- [S15] K. H. An, W. S. Kim, Y. S. Park, Y. C. Choi, S. M. Lee, D. C. Chung, D. J. Bae, S. C. Lim and Y. H. Lee, *Adv. Mater.*, 2001, 13, 497.
